# Supplementary material
Source: publisher site journal article supplement (https://www.dovepress.com/get_supplementary_file.php?f=396751.docx)
Supplement: Supplementary file 1 [file get_supplementary_file.php]

**Patient Perspectives and Side-Effects Experience on Chemotherapy of Non-Small Cell Lung Cancer: A Qualitative Study**

1. **Participant socio-demographic characteristics**
   1. **Patient ID**
   2. **Age**
      1. < 50 years b. ≥ 50 years

# Gender

- - 1. Male b. Female

# Weight

a.≤ 50 Kg b. 51-60 Kg c. 61-70 Kg d. >70 Kg

# Height

a. ≤ 1.60 b. 1.62-1.74 c. ≥ 1.75

| - 1. **Ethnicity**   2. **Education** |  | |
| --- | --- | --- |
| a. Uneducated | b. Primary/Elementary | c. Secondary |
| d. High Secondary   - 1. **Residence** | e. Bachelor | f. Master/PhD |
| a. Urban | b. Rural |  |
| - 1. **Smoking Status** |  |  |
| a. Never | b. Former | c. Current |

# Drinking Status

a. Never b. Former c. Current

# Lifestyle

a. Hygiene b. Poor

# Living situation

- 1. Living with spouse and number of kids. b. Living with spouse only, c.Widowed, d. Divorced/separated e. living alone, f. living the alone majority of the time

# Type of Cancer

- 1. **Stage of cancer**
  2. **Treatment** (Drug, dose, and cycle)

# Duration of treatment

- 1. 1–1.5 years b.1.5–2 years c. 2–5 years. d. >5 years
  2. **Disease and treatment Knowledge**

a.Knowledgeable b. Unknowledgeable

# Employment status

- 1. Retired b. Employed c. Unemployed d. On sickness leave

# Employment salary range (Pakistani rupees)

a. 30000 – 60000 b. 65000 -90000 c. 95000-150000

d. >160000

- 1. **Household Size**
  2. Small size ≤ 5 b. Big size > 5

# Household income

a. <15,000 b. 16,000-30,000 c. 31,000-45,000

d. 46,000-60,000 e. 60,000-75,000 f. >100,000

1. **Themes**

# Hospital facilities and environment

- 1. Accessibility: distance from your home to the hospital?
  2. How much time and money spend when you take a taxi or bus to the hospital?
  3. Availability and ease of access to medical professionals and therapy?
  4. How do you think about your healthcare provider? Do you trust them? Are you confident with their judgment? Do you think you feel better than before? healthcare provider continuity
  5. How can you describe your communication with Medical Professionals e.g. Doctors, Clinical Pharmacists, and Nurses? Are they supportive?

# Patient’s beliefs in alternative treatments

- 1. Do you think that concurrent use of complementary i.e., tea, juices, etc.?
  2. Do you use alternative medicines with chemotherapy?
  3. What do you think about using alternative medicines?
  4. Do alternative medicines work?
  5. Why do you use alternative medicine?
  6. Do you think western medicine works better than alternative ones?
  7. What do you prefer the most?

# Presenting a positive/negative face (Sharing experience /Viewpoint of treatment)

- 1. Encountering the impact of chemotherapy positively
  2. What do you think about Chemotherapy?
  3. Will you share your treatment experience with others?
  4. What were the difficult moments?
  5. Do you think the doctors give you all the information about the side effect?
  6. Were you aware of the side effects?
  7. What support have you got from the health providers?

# Life is for living

- 1. Openness to handling the illness
  2. What do you think about your life? Compared with before your cancer?
  3. How do you know about the diseases? Were you aware between the disease and the treatment or diagnosis?
  4. Disease awareness and living in the present
  5. Lifestyle adjustments
  6. How are you accepting your new life? What do you think of your current health status?

# Health insurance coverage

- 1. How do they manage resources to treat their illness?
  2. What do you think about the cost of diseases?
  3. What kind of health coverage do you have e.g. Public, Private, rural, or urban insurance services?
  4. Does your health insurance cover all the expenses?
  5. How much do you pay monthly for the health expenses?

# Interview questions

1. What can you tell us about your experience with ongoing chemotherapy?
2. What was the worse period of chemotherapy?
3. How were you able to embrace the chemotherapy and feel comfortable?
4. What services do you access that help you to cope with ongoing treatment?
5. Have you used complementary and alternative medicines with chemotherapy?
6. What do you think about alternative medicine with chemotherapy?
7. Have your relationships with others changed during your ongoing treatment?
8. What is your experience of attending regular follow-up appointments?
9. What has helped you to manage living your life while having chemotherapy treatments over this long period?
